# Supplementary material
Source: HighWire-hosted journal article supplement (https://jnm.snmjournals.org/highwire/filestream/103395/field_highwire_adjunct_files/0/256396_Supplemental_Data.pdf)
Supplement: 256396_Supplemental_Data.pdf [file 256396_Supplemental_Data.pdf]

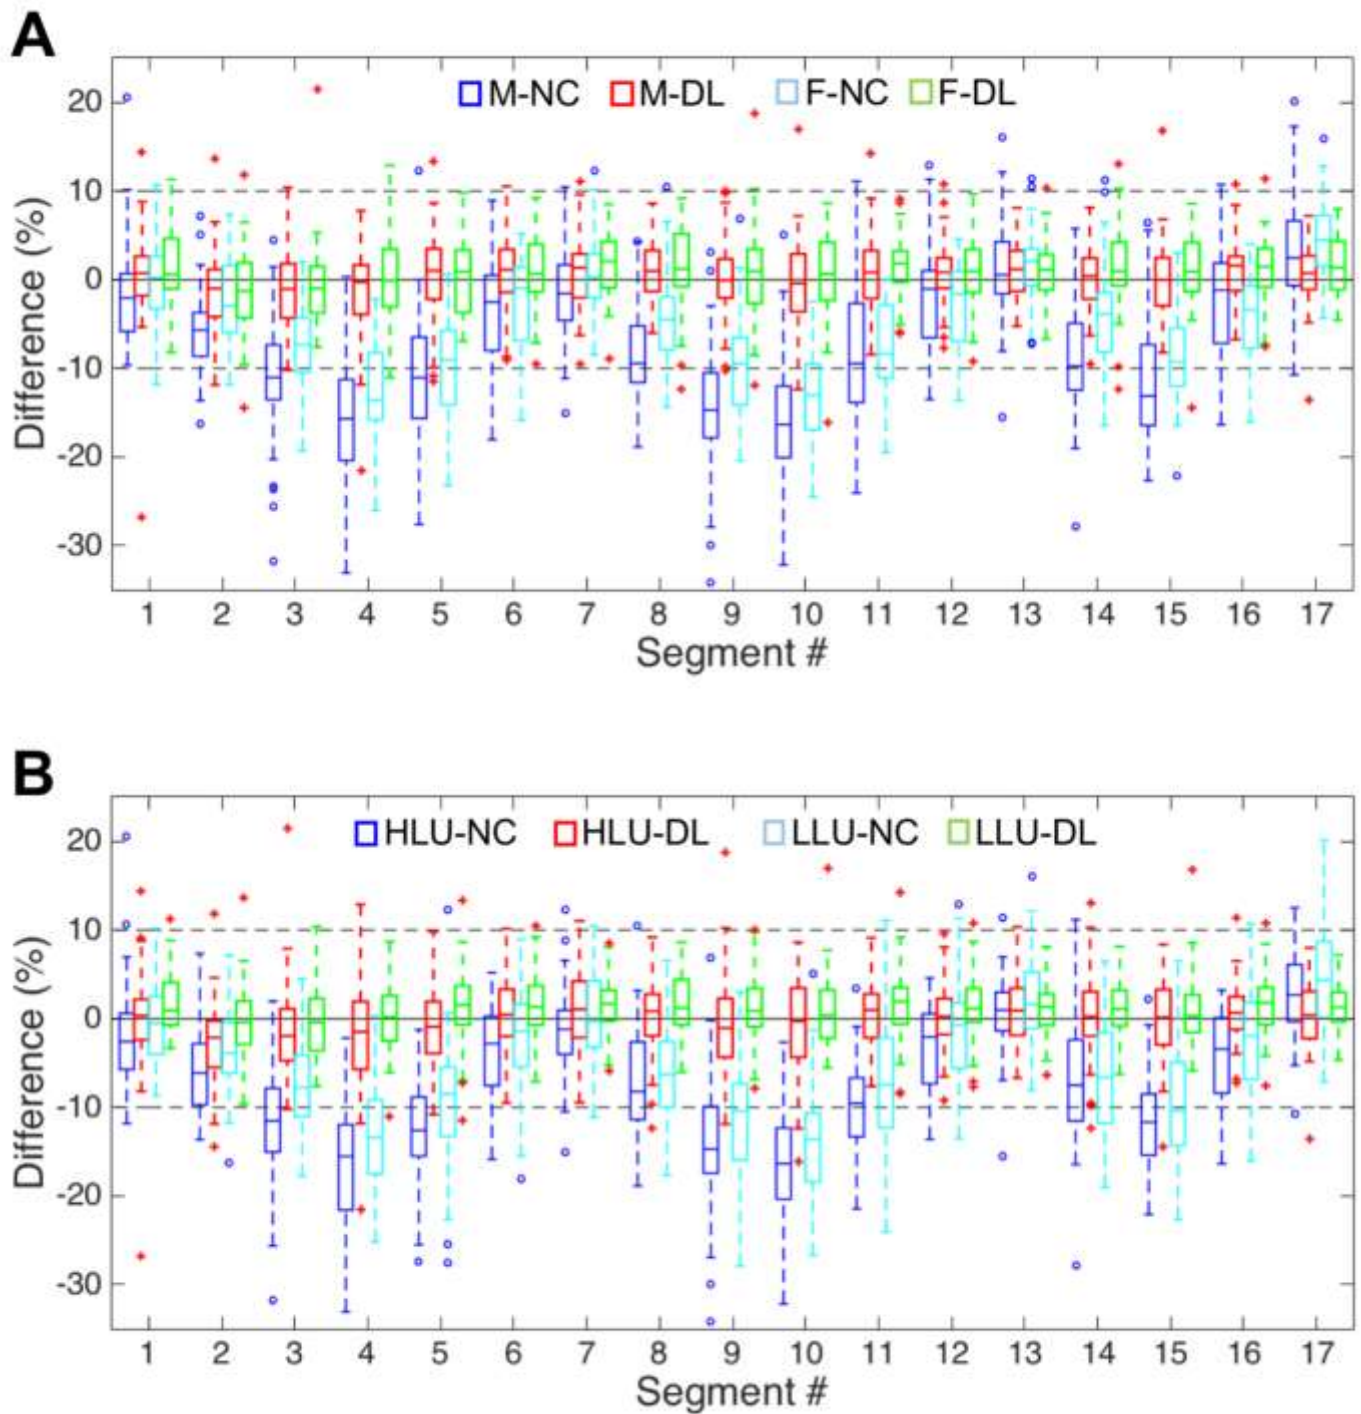

**Supplemental Figure 1.** Box plots for percentage segmental errors across (A) male and female subjects and (B) subjects with HLU and LLU (reference: SPECT<sub>CTAC</sub>, NC: non-corrected, DL: deep learning, M: male, F: female, HLU: high liver uptake, LLU: low liver uptake).

**A**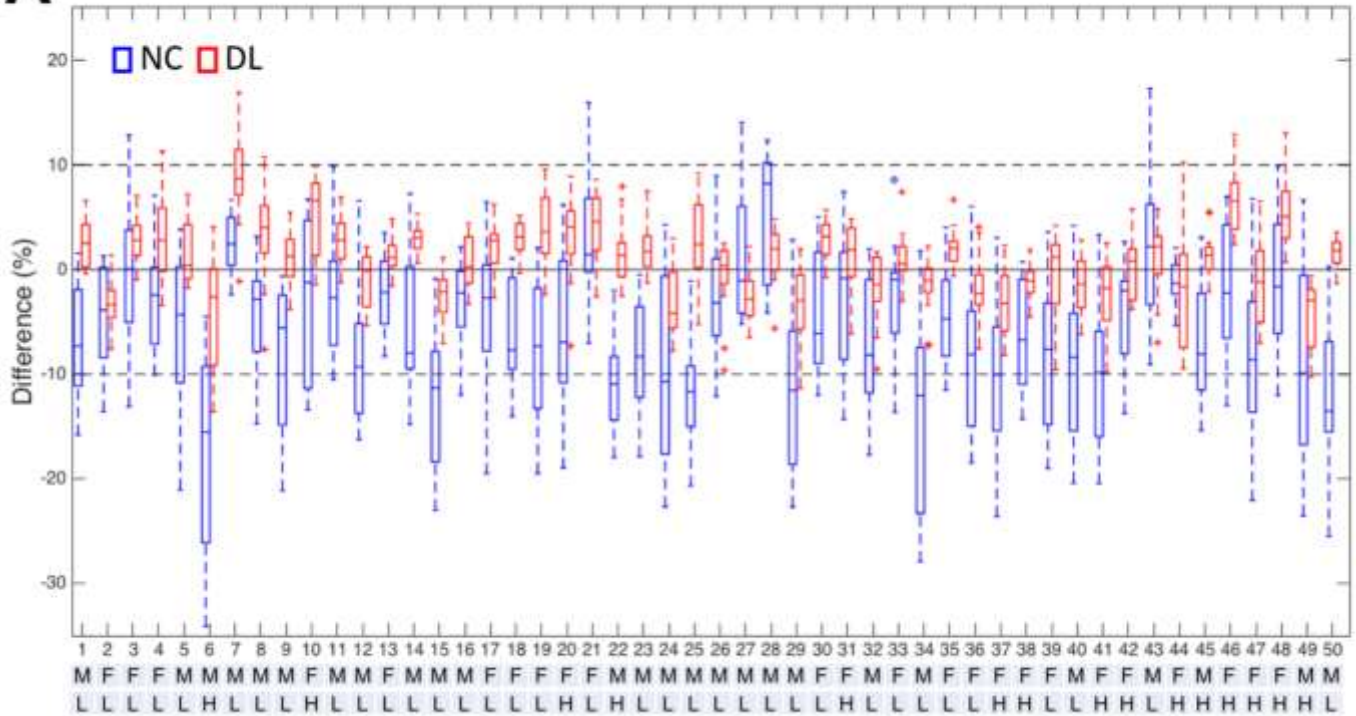**B**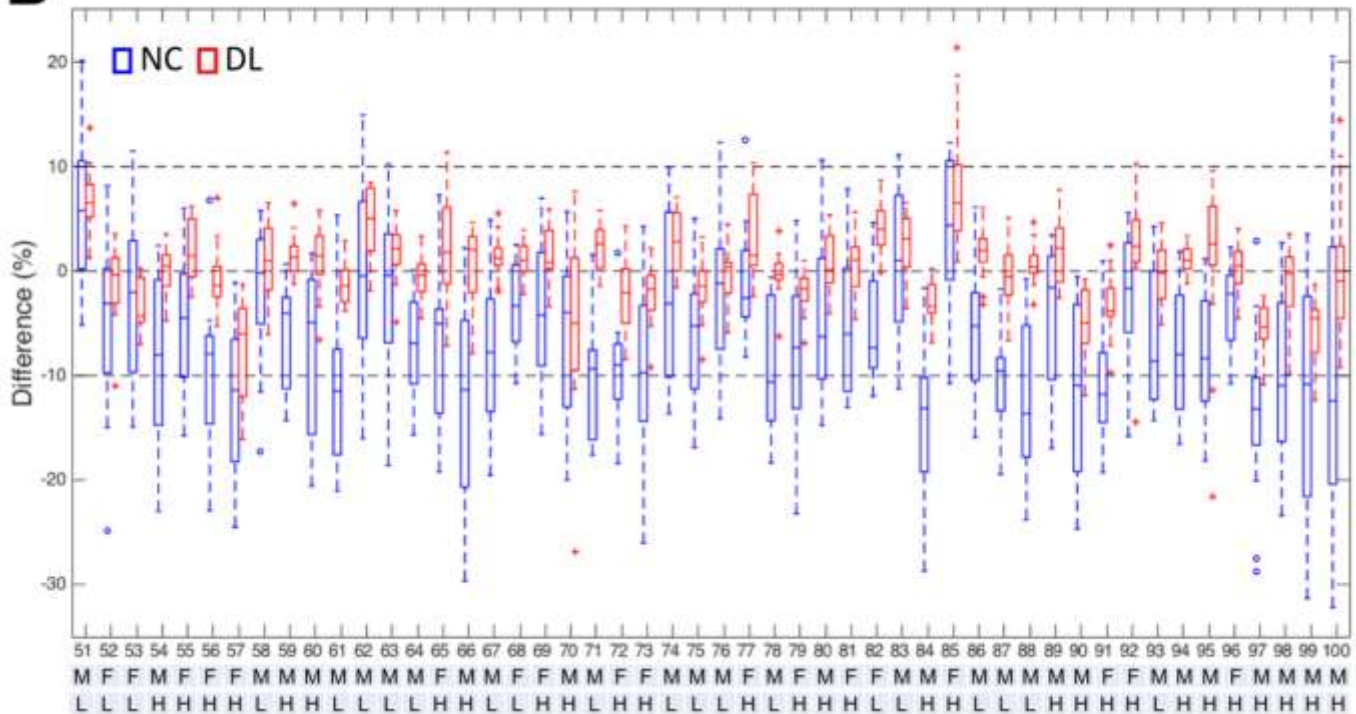

**Supplementary Figure 2.** Box plots of (A) 1-50 and (B) 51-100 subjects for percentage segmental errors for SPECT<sub>NC</sub> (blue) and SPECT<sub>DL</sub> (red) (reference: SPECT<sub>CTAC</sub>, M: male, F: female, H: high liver uptake, L: low liver uptake).

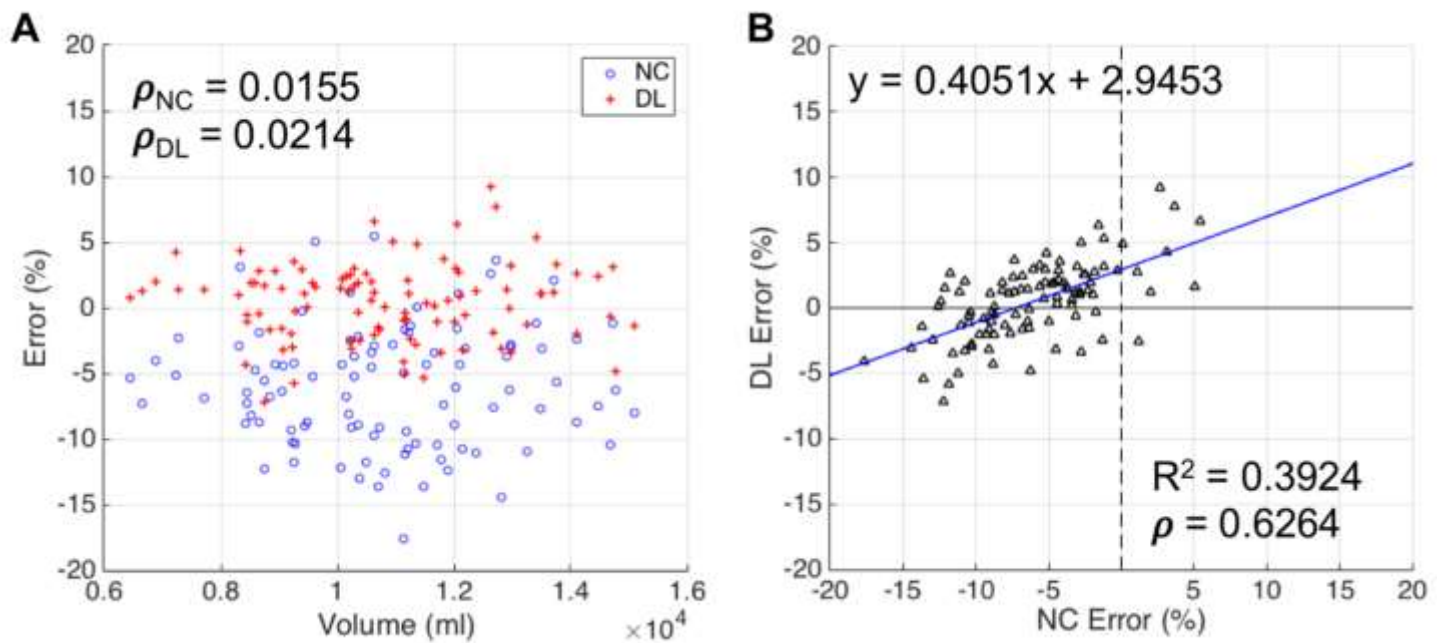

**Supplementary Figure 3.** (A) Scatter plot of the chest volumes (x-axis) and average segmental errors (y-axis) of SPECT<sub>NC</sub> (blue) and SPECT<sub>DL</sub> (red) across 100 subjects and (B) affine regression relation between the errors of SPECT<sub>NC</sub> (x-axis) and those of SPECT<sub>DL</sub> (y-axis) across 100 subjects ( $\rho$  = correlation coefficient).
